# Supplementary material
Source: PubMed Central journal article supplement (PMC5340329)
Supplement: 1139FigureS1.pdf [file 1139FigureS1.pdf]

Figure S1

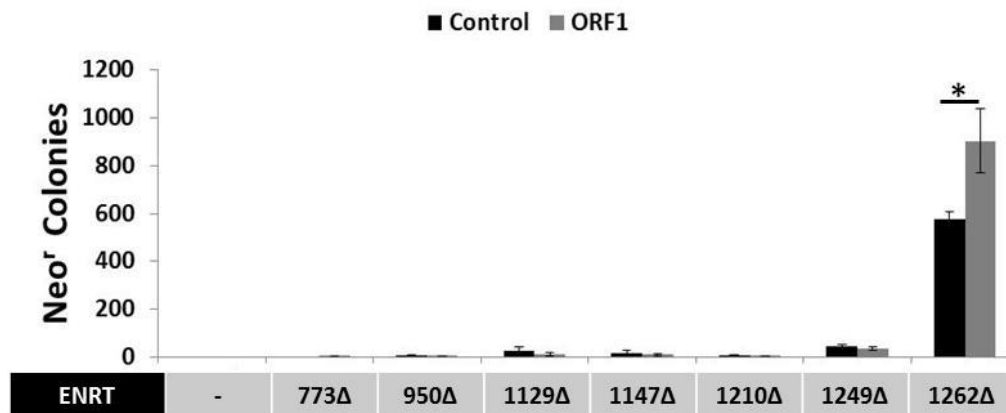

Figure S1: ORF1p-mediated increase in Alu retrotransposition driven by C-terminally truncated ORF2p fragments. Alu retrotransposition assay results.  $Neo^r$  colonies correspond to *de novo* retrotransposition events. Alu retrotransposition driven by Gal4-tagged ORF2 fragments alone (black) or with ORF1p supplemented (grey). Error bars denote standard deviation of  $n=3$  experiments. Statistical significance assessed using Student's T-test ( $*p<0.05$ ).
