# Supplementary material
Source: PubMed Central journal article supplement (PMC5340329)
Supplement: 1139FigureS2.pdf [file 1139FigureS2.pdf]

Figure S2

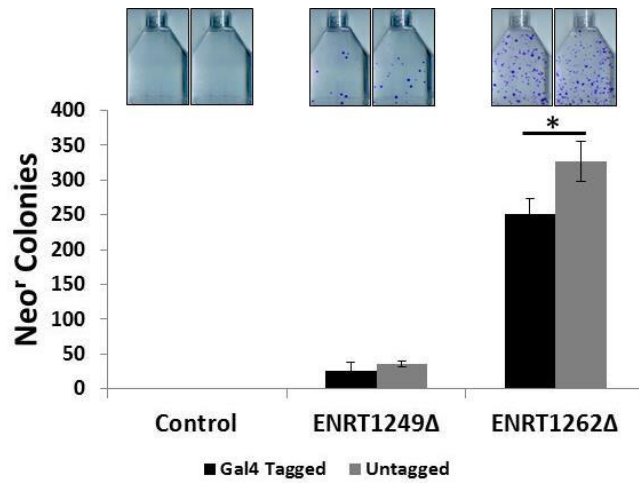

Figure S2: Gal4-tagged and Untagged ORF2 Driving Alu Retrotransposition. Alu retrotransposition assay results. Neo<sup>r</sup> colonies correspond to *de novo* retrotransposition events. Alu retrotransposition driven by Gal4-tagged (black) or untagged (grey) ORF2 expression plasmids. Error bars denote standard deviation of n=3 experiments. Statistical significance assessed using Student's T-test (\*p<0.05). Representative flasks are shown above corresponding graph bars.
