# Supplementary material
Source: PubMed Central journal article supplement (PMC5340329)
Supplement: 1139FigureS3.pdf [file 1139FigureS3.pdf]

**Figure S3**

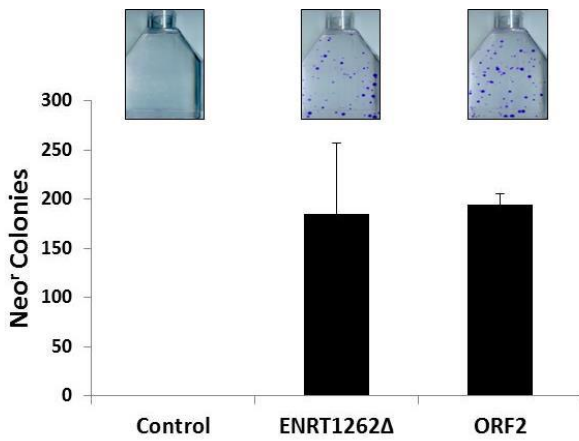

Figure S3: Untagged ORF2 fragment and ORF2 Driving Alu retrotransposition. Alu retrotransposition assay results. Neor colonies correspond to *de novo* retrotransposition events. Error bars denote standard deviation of n=3 experiments. Representative flasks are shown above corresponding graph bars.
