# Supplementary material
Source: PubMed Central journal article supplement (PMC5340329)
Supplement: 1139FigureS4.pdf [file 1139FigureS4.pdf]

Figure S4

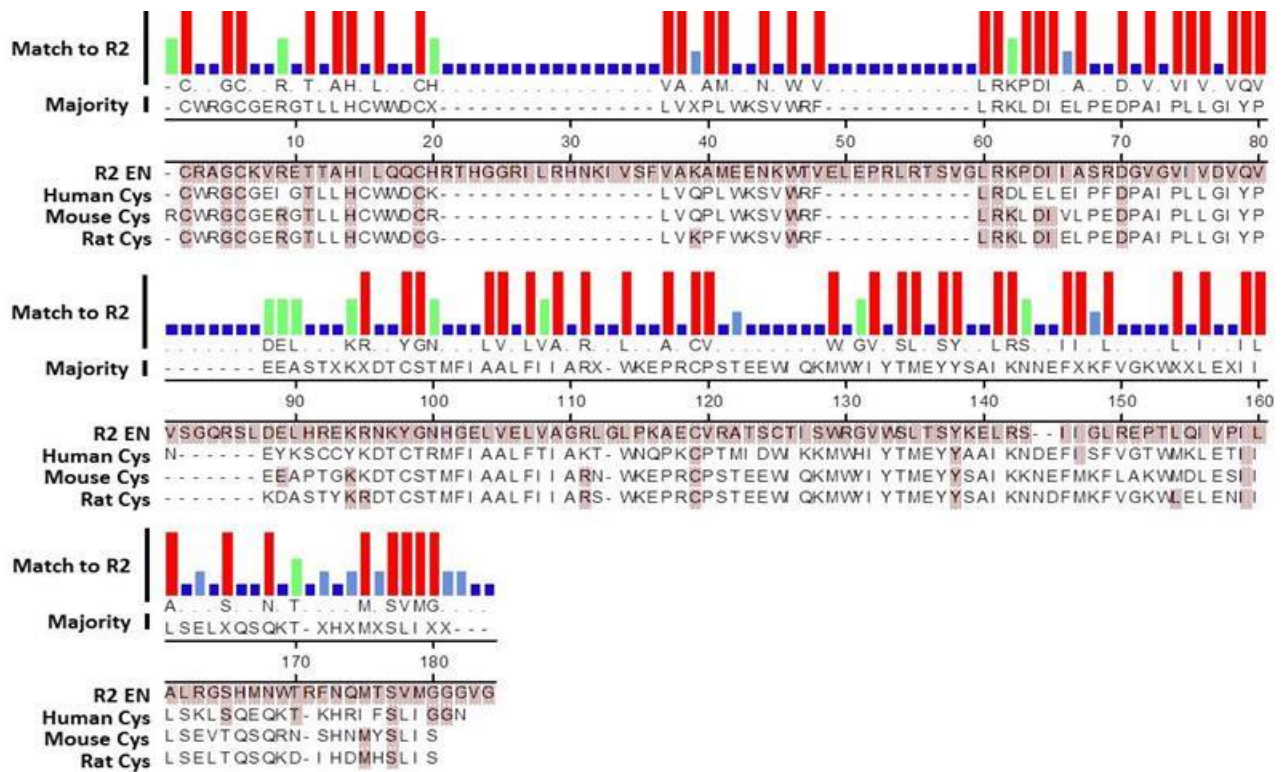

Figure S4: Full protein alignment between R2 C-terminal EN domain and C-termini of Human, Mouse, and Rat ORF2p. The origin of aligned ORF2p/ORFp is indicated at the left. Histogram plots strength of conservation of amino acid functional group relative to R2 amino acid sequence.
