# Supplementary material
Source: PubMed Central journal article supplement (PMC5340329)

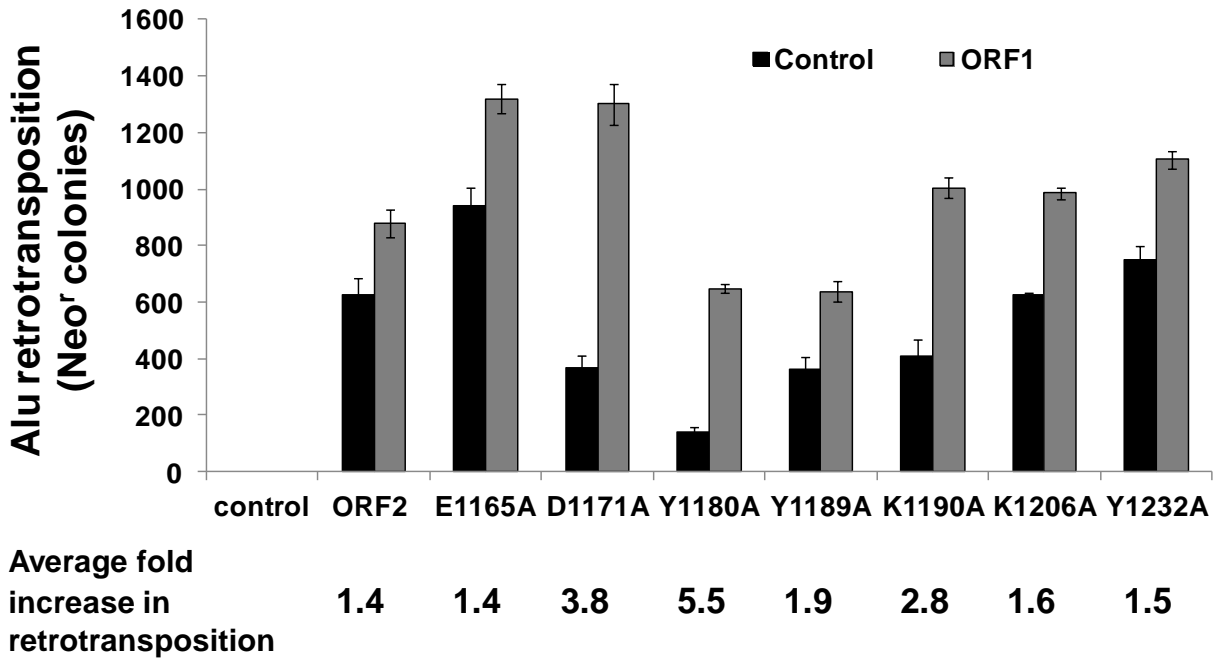

Figure S5: ORF1p-mediated increase in Alu retrotransposition driven by ORF2p.

Supplement: 1139FigureS5.pdf [file 1139FigureS5.pdf]
